# Supplementary material for: Optical Aptamer Probes of Fluorescent Imaging to Rapid Monitoring of Circulating Tumor Cell
Source: PubMed Central journal article supplement (PMC5134568; doi:10.3390/s16111909), 2016-11-23
Supplement: sensors-16-01909-s001.pdf [file sensors-16-01909-s001.pdf]

# Supplementary Materials: Optical Aptamer Probes of Fluorescent Imaging to Rapid Monitoring of Circulating Tumor Cell

Ji Yeon Hwang, Sang Tae Kim, Ho Seong Han, Kyunggon Kim and Jin Soo Han

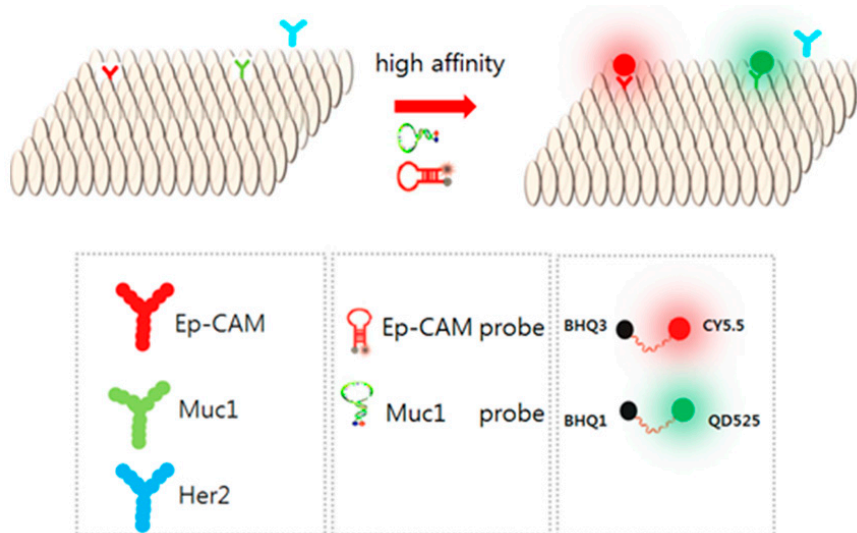

**Figure S1.** Schematic illustration of the NIF-EpCAM ALB. Multiple tumor-related proteins on CTC cell surface based on fluorescence enhancement induced by specific-affinity-triggered conformation alteration of the activated ALB probes.

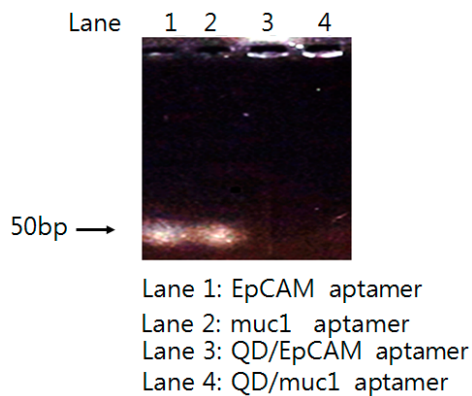

**Figure S2.** Gel electrophoresis of EpCAM ALB (lane1), muc-1 (lane2), QD<sub>565</sub>-conjugated EpCAM (lane3) and QD<sub>525</sub>-conjugated muc1 (lane4). Each sample was loaded on 1.5% agarose gel with a 100 bp molecular ladder. The conjugation pattern on gel electrophoresis was evaluated by UV excitation (235/345 nm).

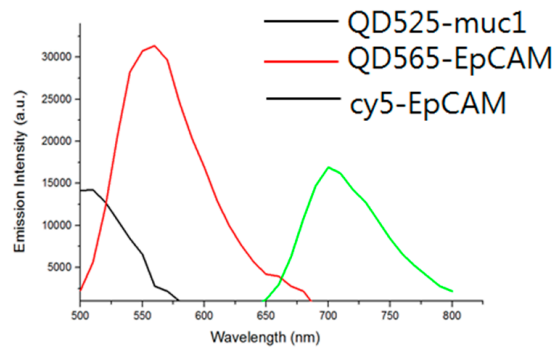

**Figure S3.** Fluorescence emission spectra of QD-muc1 (black line), QD-EpCAM (red line), and cy5.5-EpCAM (yellow green line). Excitation: 500 nm, scanning wavelength: 500–800 nm, with a band width of 25 nm.

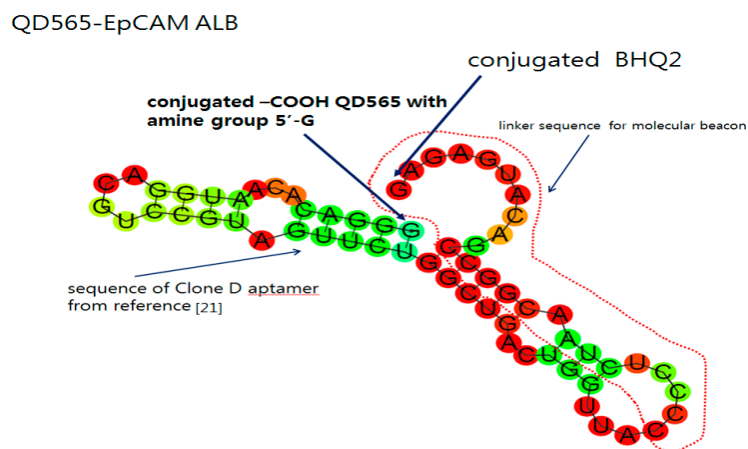

**Figure S4.** Schematic illustration of the design and function of the QD<sub>565</sub>-EpCAM ALB secondary structure by mFOLD.

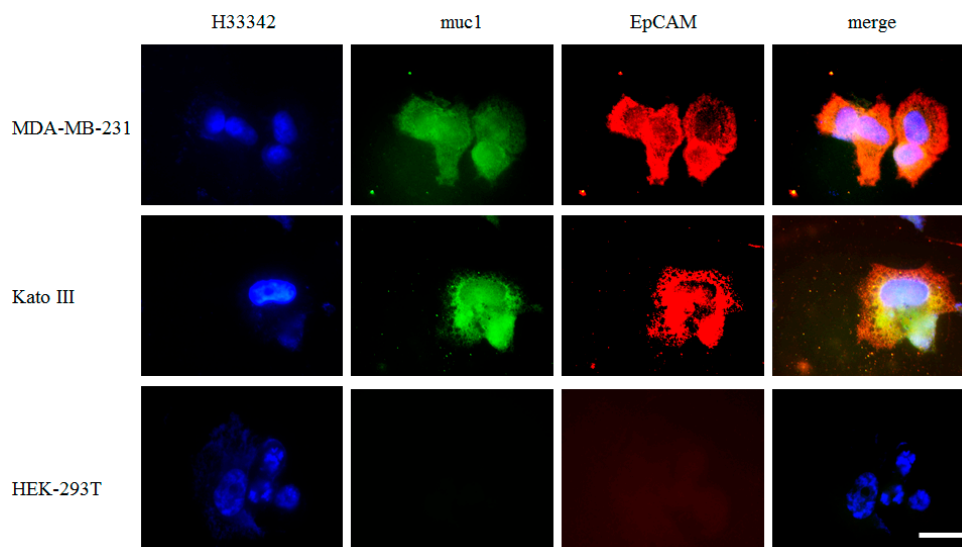

**Figure S5.** Confocal images of cultured MDA-MB-231, Kato III and HEK-293T cells labeled with the EpCAM/QD<sub>565</sub> ALB. The final concentration of the EpCAM/QD<sub>565</sub> ALB was 2 pM. Scale bars indicated 15  $\mu$ m.
